# Supplementary material for: BLNK as an Important Prognostic Indicator for Survival in Pediatric Classic Hodgkin Lymphoma: A Single-Center Retrospective Study
Source: Research Square preprint supplement (doi:10.21203/rs.3.rs-6749066/v1), 2025-06-10
Supplement: Supplementary file 1 [file 32fd9654289a245efa602f7d.xlsx]

## Sheet: Sheet1
bingli	zhuyuan	male	age	tpye	stage	huge	A/B	CRP	B淋巴细胞计数	LDH	IgG	N	L	PLT	NLR	PLR	EBV	program	生存结局	OS	BLNK	BLNK-1	CR？	CR time	develop？	PFS
16-15345	827293	0	16	1	2	1	0	94.6	107	300	8.07	6.4	1.9	244	3.36842	128.421	0	1	0	92	3	1	0	3	0	92
16-22769	835825	0	12	2	1	0	0	86	46	205	7.68	5.16	1.6	230	3.225	143.75	0	1	0	90	2	1	0	9	0	90
16-24708	838746	0	14	2	1	0	0	12	42	220	9.08	4.26	3.09	271	1.37864	87.7023	0	1	0	88	1	1	0	1.5	0	88
17-25625	876992	1	14	1	1	1	1	55	33	169	22.62	15.6	4.42	205	3.52941	46.3801	0	1	0	77	1	0	0	5	1	6
18-32062	929493	1	18	1	4	0	0	100	137	506	15.46	14.04	3.8	107	3.69474	28.1579	0	1	0	137	2	1	0	4	1	74
19-01285	935418	0	11	2	2	0	1	1.28	25.5	186	5.89	3.68	1.46	340	2.52055	232.877	0	2	0	62	2	1	0	9	0	62
19-01706	933450	0	14	2	2	0	1	10	11	183	11.12	8.89	2.1	402	4.23333	191.429	0	1	0	61	2	1	1	61	1	11
D15-08487	785740	0	6	1	2	1	1	5.4	8	272	6.18	4.31	1.52	210	2.83553	138.158	0	2	0	104	2	1	0	4	1	7
D15-15714	801059	1	6	1	3	0	0	68.64	87	220	6.7	3.93	1.62	248	2.42593	153.086	0	2	0	99	3	1	0	5	0	99
D15-16514	803677	1	11	1	1	0	0	31	50	364	8.9	6.76	1.44	330	4.69444	229.167	0	2	1	82	2	1	0	9	1	25
D15-16924	804664	0	16	1	2	0	1	19	22	209	9.67	8.34	1.01	600	8.25743	594.059	0	2	1	60	1	0	1	60	1	10
D16-00703	809406	0	12	2	4	0	0	57.3	69	162	7.32	5.89	1.22	300	4.82787	245.902	1	3	1	52	1	0	1	52	1	6
D16-10787	827458	0	11	1	4	0	1	219	5.8	118	23.74	21.66	1.62	502	13.3704	309.877	0	2	0	91	3	1	1	91	1	13
D16-16865	561548	1	10	1	3	0	0	59	17	306	4.27	3.35	1.1	238	3.04545	216.364	0	2	0	123	2	1	1	123	1	36
D16-17817	728160	1	12	2	4	0	1	42	104	343	3.53	2.91	0.52	192	5.59615	369.231	1	2	1	107	1	0	1	107	1	24
D17-09131	861649	0	6	2	4	0	1	10	39	330	4.53	3.91	0.52	192	7.51923	369.231	0	2	0	255	2	1	1	255	1	178
D19-12606	959952	0	5	2	3	0	0	20	6.9	196	5.74	2.99	1.6	218	1.86875	136.25	1	2	0	55	1	0	1	55	1	34
D19-17918	970499	0	5	2	4	0	0	10	10	299	4.6	2.2	2.2	260	1	118.182	0	2	0	54	1	1	0	5	1	10
D21-05225	837075	0	12	2	3	0	1	77	92	560	11.1	6.5	4.2	300	1.54762	71.4286	1	3	0	80	2	1	1	80	1	55
24-03355	1148668	0	5	2	3	1	1	5.74	50.8	209.3	7.96	5.13	2.16	542	2.375	250.926	1	3	0	1	6	1	1	1	0	1
23-27926	1119948	1	6	1	3	0	0	80.48	91.5	298	17.6	12.79	3.5	353	3.65429	100.857	1	3	0	6	2	1	0	6	0	6
23-29966	1122233	0	9	1	3	0	0	5.6	5.6	219	5.58	2.29	2.7	320	0.848148	118.519	1	3	0	6	1	0	0	3	0	6
	631867	0	6	2	2	0	0	26	22	258	4.7	2.3	1.5	283	3.13333	188.667	0	1	0	159	3	1	0	21	0	159
	643708	0	8	1	3	0	0	22	43	253	5.5	3.1	1.2	297	4.58333	247.5	0	2	0	154	2	0	0	14	1	29
	705097	0	10	2	4	0	0	39.3	29	200	12.44	9.45	1.77	366	7.02825	206.78	1	1	0	131	2	1	0	12	0	131
	715157	0	5	1	4	0	0	30	33	206	5.39	3.16	1.19	322	2.65546	270.588	1	1	0	127	3	1	0	9	0	127
	1001318	1	6	2	4	0	0	0.58	11	297.2	7.74	4.36	2.58	271	1.68992	105.039	1	2	0	43	2	1	0	3.5	0	43
	1001553	1	3	2	2	0	0	1.01	22	329.9	7.88	4.9	1.84	277	2.66304	150.543	1	2	0	43	3	1	0	4	0	43
	1006410	1	13	2	3	1	0	18.07	20	124	4.32	3.94	0.33	129	11.9394	390.909	0	3	0	30	2	1	0	3.5	0	30
	1007068	0	11	2	4	0	0	57.93	99.3	159	14.67	14.07	0.48	378	29.3125	787.5	1	3	0	41	2	1	0	3	0	41
	1029357	1	12	1	2	0	0	18.82	34.3	170	12.44	10.23	1.39	301	7.35971	216.547	0	3	0	34	3	1	0	8	0	34
	1030098	0	10	1	3	0	0	199.34	105.8	435	9.18	6.5	1.81	379	3.59116	209.392	1	3	0	33	2	1	0	3	0	33
	1034416	1	13	1	4	0	0	83.11	32	203	10.11	7.53	2.13	331	3.53521	155.399	0	3	0	32	5	1	0	3	0	32
	1052901	0	7	2	3	0	0	11.1	5.5	211	5.08	2.36	2.31	313	1.02165	135.498	1	3	0	27	3	1	0	3	0	27
	1060081	1	8	2	4	0	0	52.3	79.9	273	10.21	8.92	0.54	318	16.5185	588.889	1	3	0	13	2	1	0	3	0	13
	501032	0	6	2	2	0	0	19.07	22	160	3	1.6	0.5	395	3.2	790	1	1	1	99	1	0	0	15	1	13
	505246	1	9	2	4	0	1	198	105.8	435	6	3.29	1.37	329	2.40146	240.146	0	1	0	256	4	1	0	4	0	256
	664773	0	3	2	4	0	0	3	12	205	6.25	1.21	4.35	288.9	0.278161	66.4138	1	1	0	169	2	1	0	6	0	169
	674878	1	4	2	4	0	1	2	10	262	8.43	4.13	3.76	263.3	1.0984	70.0266	1	2	0	167	3	1	0	8	1	13
	679170	0	4	1	4	0	1	10.4	20	223	8.91	6.08	1.82	372.2	3.34066	204.505	1	2	1	14	1	0	0	8	1	13
	699743	0	5	2	3	0	0	1	7	187	7.48	4.94	1.57	258	3.1465	164.331	0	1	0	157	3	1	0	6	0	157
	713734	1	3	1	4	0	0	12	9	248	7.95	4.3	2.1	335	2.04762	159.524	1	1	0	153	3	1	0	13	0	153
	721158	0	6	2	4	0	0	26	13	248	7.95	4.3	2.1	335	2.04762	159.524	1	2	0	150	2	0	0	7	1	13
	746252	0	9	2	3	0	0	7.7	5.2	308	5.07	3.01	0.94	123	3.20213	130.851	1	2	0	118	2	1	0	33	1	24
	755198	1	8	1	3	0	1	7.8	10	242	4.72	3.43	0.77	244	4.45455	316.883	0	2	0	115	4	1	0	5	0	115
	795335	0	7	2	4	0	0	0.5	12	251.4	10.51	7.92	1.8	150	4.4	83.3333	1	2	0	101	3	1	0	10	0	101
	837281	0	4	2	3	0	0	0.5	26	262.9	6.93	4.37	1.71	241	2.55556	140.936	1	1	1	89	2	1	0	2.5	1	8
	860109	1	9	2	4	0	1	5	33	475.3	2.11	0.64	1.3	34	0.492308	26.1538	1	1	0	80	3	1	0	2	0	80
	865521	1	11	2	3	0	0	5.2	9.2	165.8	5.41	2.75	2.37	172	1.16034	72.5738	1	2	0	80	5	1	0	4	0	80
	867892	0	11	2	3	0	0	2.77	10	288.9	4.6	3.23	0.85	165	3.8	194.118	1	2	0	79	3	1	0	6.5	0	79
	893339	0	2	2	3	0	0	16.66	5.3	106	7.77	4.72	1.7	528	2.77647	310.588	1	2	0	73	4	1	0	17	0	73
	924568	1	10	1	4	0	1	36	55	515.4	11.53	8.72	1.11	516	7.85586	464.865	0	2	1	64	1	0	1	64	1	11
	962349	0	7	1	3	0	0	32	56	260.5	6.59	2.9	2.46	188	1.17886	76.4228	0	3	0	54	3	1	0	4	0	54
	965659	0	15	1	2	0	0	27.4	33	183.8	7.32	5.03	1.82	279	2.76374	153.297	1	3	0	53	2	1	0	3	0	53
	979984	0	11	1	4	0	1	22.43	26	374.9	4.59	4.13	0.38	571	10.8684	1502.63	0	3	0	50	4	1	0	15	0	50
	985797	0	5	2	3	0	1	62.43	56	375.3	10.23	5.32	4.07	464	1.30713	114.005	1	3	0	48	5	1	0	3	0	48
	542038	0	3	2	4	0	0	33	56	242	9.2	5.2	3.6	244	1.44444	67.7778	0	1	0	203	3	1	0	11	0	203
	572954	0	10	1	2	0	0	7.5	22	205	6.1	3.9	1.8	374	2.16667	207.778	1	1	0	186	5	1	0	6	0	186
	579433	1	3	1	4	0	0	10	16	340	6.9	4	2	186	2	93	1	2	0	185	2	1	0	15	1	10
	583785	1	12	1	2	0	1	22	33	136	7.9	5.2	1.7	543	3.05882	319.412	0	1	0	181	3	1	0	9	0	181
	583974	0	4	2	4	0	0	42	59	188	3.1	1	1.4	244	0.714286	174.286	0	1	0	181	3	1	0	10	0	181
	602556	0	5	1	2	0	0	5.6	20	215	10.6	4.9	4.8	278	1.02083	57.9167	1	1	0	172	5	1	0	9	0	172
	622461	0	6	2	4	0	0	22	3.3	194	4.8	2.25	1.67	256.9	1.34731	153.832	0	1	0	163	4	1	0	7	0	163
