# Supplementary material for: BLNK as an Important Prognostic Indicator for Survival in Pediatric Classic Hodgkin Lymphoma: A Single-Center Retrospective Study
Source: Research Square preprint supplement (doi:10.21203/rs.3.rs-6749066/v1), 2025-06-10
Supplement: Supplementary file 2 [file 485345b63922bac5a4e679ed.docx]

BLNK was downregulated in cHL, which was the prognostic variable on PFS of cHL. This study developed a BLNK-based prognostic model capable of predicting PFS outcomes in cHL patients, and screened the sensitive population of BLNK for PFS survival prediction.
